# Supplementary material for: Inhibition of Vascular Inflammation by Apolipoprotein A-IV
Source: PubMed Central journal article supplement (PMC9279673; doi:10.3389/fcvm.2022.901408), 2022-06-30
Supplement: Data_Sheet_1.pdf [file Data_Sheet_1.pdf]

## ***Supplemental Information***

### **Inhibition of Vascular Inflammation by Apolipoprotein A-IV**

Kate Shearston<sup>1</sup>, Joanne T.M. Tan<sup>2</sup>, Blake J. Cochran<sup>1</sup>, Kerry-Anne Rye<sup>1</sup>.  
<sup>1</sup>Lipid Research Group, School of Medical Sciences, Faculty of Medicine, University of New South Wales, Sydney, Australia; <sup>2</sup>Vascular Research Centre, South Australian Health and Medical Research Centre, Adelaide, South Australia.

**Corresponding Author:** Kerry-Anne Rye, Level 4E, Wallace Wurth Building, School of Medical Sciences, Faculty of Medicine, University of New South Wales Sydney, Australia 2052.

**Supplementary Table 1: Real-time PCR Primers**

| <b>Gene</b>         | <b>Direction</b> | <b>Primer sequence</b>              |
|---------------------|------------------|-------------------------------------|
| <b>Human ICAM-1</b> | Sense            | 5' CCA TCT ACA GCT TTC CGG CGC 3'   |
|                     | Antisense        | 5' CTC TGG GGT GGC CTT CAG CA 3'    |
| <b>Human VCAM-1</b> | Sense            | 5' ATG TAG TGT CAT GGG CTG TG 3'    |
|                     | Antisense        | 5' GGA ATG AGT AGA GCT CCA CC 3'    |
| <b>Human MCP-1</b>  | Sense            | 5' TCC ACA ACC CAA GAA CAC A 3'     |
|                     | Antisense        | 5' TCC ACA ACC CAA GAA CAC A 3'     |
| <b>Human DHCR24</b> | Sense            | 5' CTC CTG CCG CTC TCG CTT ATC 3'   |
|                     | Antisense        | 5' GTC TTG CTA CCC TGC TCC TTC C 3' |
| <b>Human HRPT-1</b> | Sense            | 5' TGA CAC TGG CAA AAC AAT GCA 3'   |
|                     | Antisense        | 5' GGT CCT TTT CAC CAG CAA GCT 3'   |
| <b>Human B2M</b>    | Sense            | 5' CAT CCA GCG TAC TCC AAA GA 3'    |
|                     | Antisense        | 5' GAC AAG TCT GAA TGC TCC AC 3'    |

**Supplementary Table 2: A single apoA-IV infusion does not affect plasma lipid, NEFA, apoA-I or apoA-IV levels in NZW rabbits**

| Plasma Lipids                                  | Treatment | Baseline (T=0 h) | Collar insertion (24 h) | Euthanasia (48 h) |
|------------------------------------------------|-----------|------------------|-------------------------|-------------------|
| Apolipoprotein ( $\mu\text{mol/L}$ )           | Saline    | 417.5 $\pm$ 35   | 412.2 $\pm$ 28          | 488.4 $\pm$ 35    |
|                                                | ApoA-I    | 415.6 $\pm$ 52   | 444.6 $\pm$ 61          | 448.5 $\pm$ 80    |
|                                                | ApoA-IV   | 359.6 $\pm$ 15   | 372.2 $\pm$ 26          | 456.9 $\pm$ 31    |
| Phospholipid ( $\mu\text{mol/L}$ )             | Saline    | 842.3 $\pm$ 37   | 856.7 $\pm$ 126         | 789.0 $\pm$ 36    |
|                                                | ApoA-I    | 904.0 $\pm$ 80   | 853.2 $\pm$ 87          | 887.8 $\pm$ 76    |
|                                                | ApoA-IV   | 843.0 $\pm$ 70   | 819.6 $\pm$ 87          | 887.4 $\pm$ 73    |
| Unesterified Cholesterol ( $\mu\text{mol/L}$ ) | Saline    | 144.7 $\pm$ 17   | 123.4 $\pm$ 10          | 135.5 $\pm$ 11    |
|                                                | ApoA-I    | 145.2 $\pm$ 8    | 155.2 $\pm$ 25          | 144.2 $\pm$ 6     |
|                                                | ApoA-IV   | 146.7 $\pm$ 11   | 147.4 $\pm$ 24          | 162.7 $\pm$ 14    |
| Total Cholesterol ( $\mu\text{mol/L}$ )        | Saline    | 769.1 $\pm$ 66   | 635.8 $\pm$ 50          | 704.5 $\pm$ 50    |
|                                                | ApoA-I    | 699.1 $\pm$ 74   | 727.3 $\pm$ 99          | 635.3 $\pm$ 83    |
|                                                | ApoA-IV   | 685.5 $\pm$ 75   | 685.5 $\pm$ 75          | 755.1 $\pm$ 68    |

NZW rabbits (n=6/group) were randomised to receive iv saline, lipid-free apoA-I (8 mg/kg), or lipid-free apoA-IV (1 mg/kg) at 24 h prior to placement of a non-occlusive, peri-arterial collar around the left common carotid artery. The animals were euthanised 24 h after collar placement and plasma lipid, apoA-I and apoA-IV levels were quantified as described in Materials and Methods.

**Supplementary Table 3: A single apoA-IV infusion does not affect HDL composition in NZW rabbits**

| <b>Treatment</b> | <b>PL/UC/CE/apoA-I)<br/>(mol/mol)</b> | <b>Particle Diameter<br/>(nm)</b> |
|------------------|---------------------------------------|-----------------------------------|
| <b>Saline</b>    | 17.6±4.0/1.5±0.8/13.6±0.3/1.0         | 8.9                               |
| <b>ApoA-I</b>    | 21.8±3.0/1.6±0.5/11.0±2.0/1.0         | 9.0                               |
| <b>ApoA-IV</b>   | 19.5±6.0/1.8±0.2/10.6.0/1.0           | 9.2                               |

NZW rabbits (n=6/group) were randomised to receive iv saline, lipid-free apoA-I (8 mg/kg iv), or lipid-free apoA-IV (1 mg/kg iv) at 24 h prior to placement of a non-occlusive, peri-arterial collar around the left common carotid artery. The animals were euthanised 24 h after collar placement and HDLs were isolated by ultracentrifugation and their composition was quantified as described in Materials and Methods.
