# Supplementary material for: Inhibition of Vascular Inflammation by Apolipoprotein A-IV
Source: Frontiers journal article supplement (doi:10.3389/fcvm.2022.901408), 2022-06-30
Supplement: Data_Sheet_1.pdf [file Data_Sheet_1.pdf]

## ***Supplemental Information***

### **Inhibition of Vascular Inflammation by Apolipoprotein A-IV**

Kate Shearston<sup>1</sup>, Joanne T.M. Tan<sup>2,3</sup>, Blake J. Cochran<sup>1</sup>, Kerry-Anne Rye<sup>1\*</sup>.

<sup>1</sup>Lipid Research Group, School of Medical Sciences, Faculty of Medicine, University of New South Wales, Sydney, NSW, Australia; <sup>2</sup>Vascular Research Centre, Lifelong Health Theme, South Australian Health and Medical Research Institute, Adelaide, Australia, <sup>3</sup> Adelaide Medical School, The University of Adelaide, Adelaide, SA, Australia.

**Corresponding Author:** Kerry-Anne Rye, Level 4E, Wallace Wurth Building, School of Medical Sciences, Faculty of Medicine, University of New South Wales Sydney, Australia 2052.

**Supplementary Table 1: Real-time PCR Primers**

| <b>Gene</b>         | <b>Direction</b> | <b>Primer sequence</b>              |
|---------------------|------------------|-------------------------------------|
| <b>Human ICAM-1</b> | Sense            | 5' CCA TCT ACA GCT TTC CGG CGC 3'   |
|                     | Antisense        | 5' CTC TGG GGT GGC CTT CAG CA 3'    |
| <b>Human VCAM-1</b> | Sense            | 5' ATG TAG TGT CAT GGG CTG TG 3'    |
|                     | Antisense        | 5' GGA ATG AGT AGA GCT CCA CC 3'    |
| <b>Human MCP-1</b>  | Sense            | 5' TCC ACA ACC CAA GAA CAC A 3'     |
|                     | Antisense        | 5' TCC ACA ACC CAA GAA CAC A 3'     |
| <b>Human DHCR24</b> | Sense            | 5' CTC CTG CCG CTC TCG CTT ATC 3'   |
|                     | Antisense        | 5' GTC TTG CTA CCC TGC TCC TTC C 3' |
| <b>Human HRPT-1</b> | Sense            | 5' TGA CAC TGG CAA AAC AAT GCA 3'   |
|                     | Antisense        | 5' GGT CCT TTT CAC CAG CAA GCT 3'   |
| <b>Human B2M</b>    | Sense            | 5' CAT CCA GCG TAC TCC AAA GA 3'    |
|                     | Antisense        | 5' GAC AAG TCT GAA TGC TCC AC 3'    |

**Supplementary Table 2: A single apoA-IV infusion does not affect plasma lipid, apoA-I or apoA-IV levels in NZW rabbits**

| <b>Plasma Lipids</b>                                                   | <b>Treatment</b> | <b>Baseline<br/>(T=0 h)</b> | <b>Collar insertion<br/>(24 h)</b> | <b>Euthanasia<br/>(48 h)</b> |
|------------------------------------------------------------------------|------------------|-----------------------------|------------------------------------|------------------------------|
| <b>Apolipoprotein<br/>(<math>\mu\text{mol/L}</math>)</b>               | <b>Saline</b>    | 417.5 $\pm$ 35              | 412.2 $\pm$ 28                     | 488.4 $\pm$ 35               |
|                                                                        | <b>ApoA-I</b>    | 415.6 $\pm$ 52              | 444.6 $\pm$ 61                     | 448.5 $\pm$ 80               |
|                                                                        | <b>ApoA-IV</b>   | 359.6 $\pm$ 15              | 372.2 $\pm$ 26                     | 456.9 $\pm$ 31               |
| <b>Phospholipid<br/>(<math>\mu\text{mol/L}</math>)</b>                 | <b>Saline</b>    | 842.3 $\pm$ 37              | 856.7 $\pm$ 126                    | 789.0 $\pm$ 36               |
|                                                                        | <b>ApoA-I</b>    | 904.0 $\pm$ 80              | 853.2 $\pm$ 87                     | 887.8 $\pm$ 76               |
|                                                                        | <b>ApoA-IV</b>   | 843.0 $\pm$ 70              | 819.6 $\pm$ 87                     | 887.4 $\pm$ 73               |
| <b>Unesterified<br/>Cholesterol<br/>(<math>\mu\text{mol/L}</math>)</b> | <b>Saline</b>    | 144.7 $\pm$ 17              | 123.4 $\pm$ 10                     | 135.5 $\pm$ 11               |
|                                                                        | <b>ApoA-I</b>    | 145.2 $\pm$ 8               | 155.2 $\pm$ 25                     | 144.2 $\pm$ 6                |
|                                                                        | <b>ApoA-IV</b>   | 146.7 $\pm$ 11              | 147.4 $\pm$ 24                     | 162.7 $\pm$ 14               |
| <b>Total Cholesterol<br/>(<math>\mu\text{mol/L}</math>)</b>            | <b>Saline</b>    | 769.1 $\pm$ 66              | 635.8 $\pm$ 50                     | 704.5 $\pm$ 50               |
|                                                                        | <b>ApoA-I</b>    | 699.1 $\pm$ 74              | 727.3 $\pm$ 99                     | 635.3 $\pm$ 83               |
|                                                                        | <b>ApoA-IV</b>   | 685.5 $\pm$ 75              | 685.5 $\pm$ 75                     | 755.1 $\pm$ 68               |

NZW rabbits (n=6/group) were randomised to receive iv saline, lipid-free apoA-I (8 mg/kg), or lipid-free apoA-IV (1 mg/kg) at 24 h prior to placement of a non-occlusive, peri-arterial collar around the left common carotid artery. The animals were euthanised 24 h after collar placement and plasma lipid, apoA-I and apoA-IV levels were quantified as described in Materials and Methods.

**Supplementary Table 3: A single apoA-IV infusion does not affect HDL composition or size in NZW rabbits**

| <b>Treatment</b> | <b>PL/UC/CE/apoA-I)<br/>(<i>mol/mol</i>)</b> | <b>Particle Diameter<br/>(<i>nm</i>)</b> |
|------------------|----------------------------------------------|------------------------------------------|
| <b>Saline</b>    | 17.6±4.0/1.5±0.8/13.6±0.3/1.0                | 8.9                                      |
| <b>ApoA-I</b>    | 21.8±3.0/1.6±0.5/11.0±2.0/1.0                | 9.0                                      |
| <b>ApoA-IV</b>   | 19.5±6.0/1.8±0.2/10.6.0/1.0                  | 9.2                                      |

NZW rabbits (n=6/group) were randomised to receive iv saline, lipid-free apoA-I (8 mg/kg iv), or lipid-free apoA-IV (1 mg/kg iv) at 24 h prior to placement of a non-occlusive, peri-arterial collar around the left common carotid artery. The animals were euthanised 24 h after collar placement, the HDLs were isolated by ultracentrifugation and their composition and size were quantified as described in Materials and Methods.
